# Supplementary material for: Vitamin D Receptor (VDR) Genetic Variants: Relationship of FokI Genotypes with VDR Expression and Clinical Disease Activity in Systemic Lupus Erythematosus Patients
Source: MDPI journal article supplement (doi:10.3390/genes13112016), 2022-11-03
Supplement: s1 [file s1]

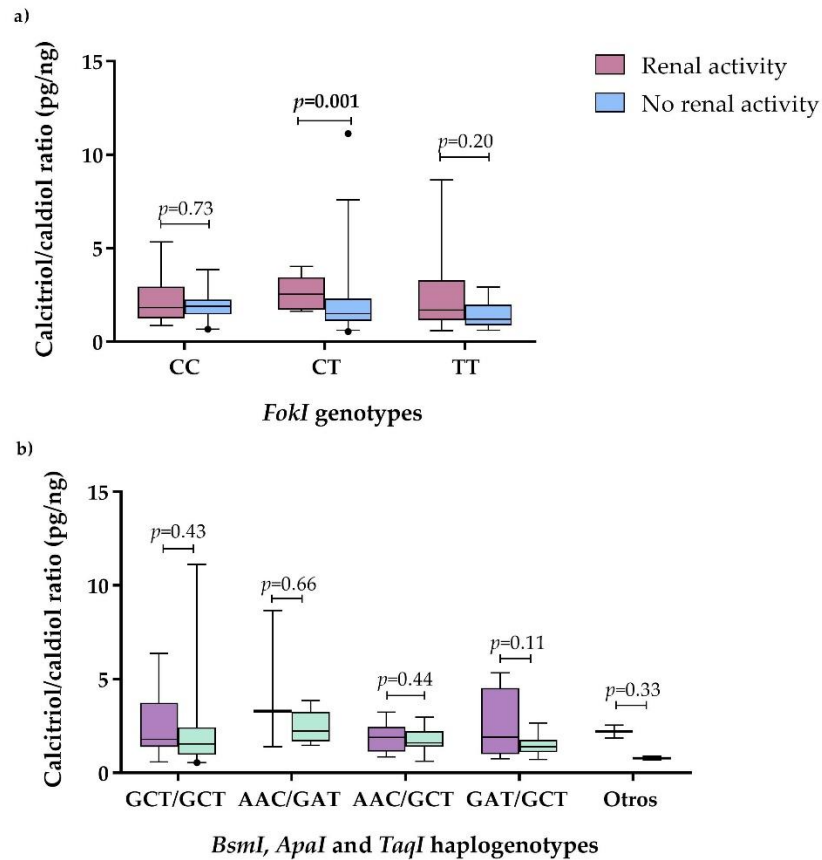

**Figure S1.** Calcitriol/calcidiol ratio by *VDR* genotypes and haplogenotypes in SLE patients by clinical activity. **a)** Calcitriol/calcidiol ratio by *FokI* genotypes in SLE, **b)** Calcitriol/calcidiol ratio by *BsmI*, *ApaI* and *TaqI* haplogenotypes in SLE. Data provided in medians (p05<sup>th</sup>-p95<sup>th</sup>), Mann-Whitney test. Highlighted values represent significant difference ( $p < 0.05$ ). SLE: systemic lupus erythematosus.

**Table S1.** Vitamin D serum status between SLE patients *vs.* CS according the *FokI* genotypes and *VDR* haplogenotypes

| Study group<br>SLE <i>vs.</i> CS | Calcidiol (ng/mL) |     |                   | Calcitriol/calcidiol ratio<br>(pg/ng) |    |                   | Calcitriol (pg/mL) |    |                   |
|----------------------------------|-------------------|-----|-------------------|---------------------------------------|----|-------------------|--------------------|----|-------------------|
|                                  | Median            | n   | <i>p</i><br>value | Median                                | n  | <i>p</i><br>value | Median             | n  | <i>p</i><br>value |
| <i>FokI</i> CC-SLE               | 23.3              | 45  | 0.69              | 2.01                                  | 45 | 0.03              | 46.1               | 45 | 0.001             |
| <i>FokI</i> CC-CS                | 22.3              | 57  |                   | 1.78                                  | 46 |                   | 39.8               | 46 |                   |
| <i>FokI</i> CT- SLE              | 19.2              | 78  | 0.02              | 2.24                                  | 63 | <0.001            | 47.9               | 64 | <0.001            |
| <i>FokI</i> CT- CS               | 23.6              | 100 |                   | 1.42                                  | 88 |                   | 35.2               | 88 |                   |
| <i>FokI</i> TT- SLE              | 20.9              | 45  | 0.26              | 2.64                                  | 43 | <0.01             | 50.8               | 43 | <0.01             |
| <i>FokI</i> TT- CS               | 24.4              | 38  |                   | 1.42                                  | 9  |                   | 34.9               | 29 |                   |
| GCT/GCT- SLE                     | 20.2              | 48  | 0.02              | 2.43                                  | 44 | <0.001            | 48.6               | 44 | <0.01             |
| GCT/GCT- CS                      | 25.1              | 56  |                   | 1.39                                  | 49 |                   | 38.1               | 49 |                   |
| AAC/GAT- SLE                     | 16.1              | 18  | 0.01              | 2.80                                  | 17 | 0.01              | 46.3               | 17 | 0.10              |
| AAC/GAT- CS                      | 23.9              | 15  |                   | 1.65                                  | 14 |                   | 39.3               | 14 |                   |
| AAC/GCT- SLE                     | 21.9              | 43  | 0.42              | 2.09                                  | 36 | <0.001            | 46.1               | 37 | <0.001            |
| AAC/GCT- CS                      | 23.0              | 52  |                   | 1.41                                  | 45 |                   | 34.4               | 45 |                   |
| GAT/GCT- SLE                     | 24.4              | 37  | 0.86              | 1.86                                  | 36 | 0.11              | 47.1               | 36 | 0.01              |
| GAT/GCT- CS                      | 22.3              | 35  |                   | 1.55                                  | 32 |                   | 36.4               | 32 |                   |
| GAT/GAT- SLE                     | 23.5              | 7   | 0.72              | 1.80                                  | 7  | 0.40              | 42.2               | 7  | 0.53              |
| GAT/GAT- CS                      | 23.9              | 11  |                   | 2.17                                  | 9  |                   | 48.7               | 9  |                   |

Data provided in medians (percentile: p05<sup>th</sup>-p95<sup>th</sup>), Mann-Whitney test. SLE: systemic lupus erythematosus. CS: control subject.

**Table S2.** Vitamin D serum status analysis intra each group (SLE patients and CS) by the FokI genotypes and VDR haplogenotypes

| Variable and study group              | FokI genotypes<br><i>p</i> values |           |           | VDR haplogenotypes <i>p</i> values |                     |                     |                     |                     |                     |                     |                     |                     |                     |
|---------------------------------------|-----------------------------------|-----------|-----------|------------------------------------|---------------------|---------------------|---------------------|---------------------|---------------------|---------------------|---------------------|---------------------|---------------------|
|                                       | CC vs. CT                         | CC vs. TT | CT vs. TT | GCT/GCT vs. AAC/GAT                | GCT/GCT vs. AAC/GCT | GCT/GCT vs. GAT/GCT | GCT/GCT vs. GAT/GAT | AAC/GAT vs. AAC/GCT | AAC/GAT vs. GAT/GCT | AAC/GAT vs. GAT/GAT | AAC/GCT vs. GAT/GCT | AAC/GCT vs. GAT/GAT | GAT/GCT vs. GAT/GAT |
| <b>SLE patients (intra group)</b>     |                                   |           |           |                                    |                     |                     |                     |                     |                     |                     |                     |                     |                     |
| Calcidiol (ng/mL)                     | 0.11                              | 0.22      | 0.88      | 0.21                               | 0.61                | 0.38                | 0.30                | 0.17                | <b>0.04</b>         | 0.08                | 0.50                | 0.41                | 0.59                |
| Calcitriol/calcidiol ratio (pg/ng)    | 0.95                              | 0.65      | 0.43      | 0.84                               | 0.44                | 0.87                | 0.22                | 0.71                | 0.90                | 0.43                | 0.46                | 0.45                | 0.27                |
| Calcitriol (pg/mL)                    | 0.86                              | 0.50      | 0.58      | 0.61                               | 0.43                | 0.53                | 0.20                | 0.22                | 0.25                | 0.13                | 0.97                | 0.39                | 0.46                |
| <b>Control subjects (intra group)</b> |                                   |           |           |                                    |                     |                     |                     |                     |                     |                     |                     |                     |                     |
| Calcidiol (ng/mL)                     | 0.48                              | 0.49      | 0.78      | 0.90                               | 0.15                | 0.13                | 0.49                | 0.42                | 0.27                | 0.61                | 0.52                | 0.89                | 0.96                |
| Calcitriol/calcidiol ratio (pg/ng)    | 0.26                              | 0.59      | 0.75      | 0.94                               | 0.17                | 0.74                | 0.21                | 0.34                | 0.86                | 0.22                | 0.32                | <b>0.03</b>         | 0.20                |
| Calcitriol (pg/mL)                    | 0.09                              | 0.95      | 0.17      | 0.82                               | 0.33                | 0.55                | 0.05                | 0.34                | 0.90                | 0.15                | 0.09                | <b>&lt;0.01</b>     | 0.09                |

The *p* values indicate the differences found within each group. Mann-Whitney test. The data of the medians of each group is found in table S1

**Table S3.** Vitamin D serum status in SLE patients by clinical activity according the *FokI* genotypes and *VDR* haplotypes

| Study group by clinical activity | Calcidiol (ng/mL) |    |                | Calcitriol/calcidiol ratio (pg/ng) |    |                | Calcitriol (pg/mL) |    |                |
|----------------------------------|-------------------|----|----------------|------------------------------------|----|----------------|--------------------|----|----------------|
|                                  | Median            | n  | <i>p</i> value | Median                             | n  | <i>p</i> value | Median             | n  | <i>p</i> value |
| FokI CC-Active SLE               | 21.9              | 20 | 0.29           | 2.48                               | 20 | 0.22           | 46.6               | 20 | 0.90           |
| FokI CC- Remission SLE           | 24.5              | 22 |                | 1.90                               | 21 |                | 46.2               | 21 |                |
| FokI CT- Active SLE              | 18.9              | 26 | 0.28           | 3.40                               | 20 | 0.07           | 49.2               | 20 | 0.14           |
| FokI CT- Remission SLE           | 20.3              | 45 |                | 1.91                               | 40 |                | 45.4               | 41 |                |
| FokI TT- Active SLE              | 24.5              | 21 | 0.50           | 1.90                               | 20 | 0.74           | 44.8               | 20 | 0.78           |
| FokI TT- Remission SLE           | 21.9              | 20 |                | 2.64                               | 19 |                | 50.8               | 19 |                |
| GCT/GCT- Active SLE              | 20.6              | 17 | 0.94           | 3.63                               | 14 | 0.55           | 52.5               | 14 | 0.14           |
| GCT/GCT- Remission SLE           | 19.6              | 29 |                | 2.11                               | 28 |                | 45.7               | 28 |                |
| AAC/GAT- Active SLE              | 12.1              | 7  | 0.03           | 4.21                               | 6  | 0.25           | 44.9               | 6  | 0.80           |
| AAC/GAT- Remission SLE           | 21.4              | 11 |                | 2.80                               | 11 |                | 46.3               | 11 |                |
| AAC/GCT- Active SLE              | 22.2              | 20 | 0.40           | 2.10                               | 18 | 0.53           | 42.1               | 18 | 0.59           |
| AAC/GCT- Remission SLE           | 22.9              | 17 |                | 2.15                               | 15 |                | 46.7               | 16 |                |
| GAT/GCT- Active SLE              | 25.5              | 14 | 0.93           | 1.60                               | 14 | 0.45           | 47.1               | 14 | 0.53           |
| GAT/GCT- Remission SLE           | 23.9              | 20 |                | 1.92                               | 19 |                | 44.7               | 19 |                |
| GAT/GAT- Active SLE              | 36.5              | 2  | 0.20           | --                                 | -- | --             | 48.0               | 7  | --             |
| GAT/GAT- Remission SLE           | 20.6              | 3  |                | --                                 | -- |                | 46.7               | 7  |                |

**Table S4.** Vitamin D metabolism variables and *VDR* variants in SLE patients stratified by renal activity.

| Variable                                        | Renal activity<br>(n=34) | No renal activity<br>(n=69) | <i>p</i> value |
|-------------------------------------------------|--------------------------|-----------------------------|----------------|
| <b>Vitamin D metabolism variables</b>           |                          |                             |                |
| Calcidiol (ng/mL) <sup>a</sup>                  | 20.6 (3.26-44.3)         | 25.1 (12.2-40.4)            | 0.13           |
| Calcitriol (pg/mL) <sup>a</sup>                 | 47 (19.0-53.2)           | 41.5 (21.8-51.2)            | <b>0.02</b>    |
| Calcitriol/calcidiol ratio (pg/ng) <sup>a</sup> | 2.13 (0.76-15.3)         | 1.54 (0.71-3.21)            | <b>0.02</b>    |
| <b>VDR variants</b>                             |                          |                             |                |
| <b><i>FokI</i> genotypes % (n)<sup>b</sup></b>  |                          |                             | 0.40           |
| CC                                              | 21 (7/34)                | 30 (21/69)                  |                |
| CT                                              | 47 (16/34)               | 48 (33/69)                  |                |
| TT                                              | 32 (11/34)               | 22 (15/69)                  |                |
| <b><i>BsmI</i> genotypes % (n)<sup>b</sup></b>  |                          |                             | 0.44           |
| AA                                              | 6 (2/34)                 | 2 (1/69)                    |                |
| AG                                              | 35 (12/34)               | 35 (24/69)                  |                |
| GG                                              | 59 (20/34)               | 64 (44/69)                  |                |
| <b><i>ApaI</i> genotypes % (n)<sup>b</sup></b>  |                          |                             | 0.93           |
| AA                                              | 15 (5/34)                | 14 (10/69)                  |                |
| AC                                              | 47 (16/34)               | 51 (35/69)                  |                |
| CC                                              | 38 (13/34)               | 35 (24/69)                  |                |
| <b><i>TaqI</i> genotypes % (n)<sup>b</sup></b>  |                          |                             | 0.69           |
| CC                                              | 3 (1/34)                 | 1 (1/69)                    |                |
| CT                                              | 44 (15/34)               | 38 (26/69)                  |                |
| TT                                              | 53 (18/34)               | 61 (42/69)                  |                |

<sup>a</sup>Data provided in medians (percentile: p05th-p95th), Mann-Whitney test. <sup>b</sup>Data provided in percentages and n,  $\chi^2$  test. Highlighted data indicate significant differences.
